# Supplementary material for: Social network analysis of manga: similarities to real-world social networks and trends over decades
Source: Springer Nature journal article supplement (doi:10.1007/s41109-023-00604-0), 2023-11-13
Supplement: MOESM2 [file 26299514]

# Supplementary information for

## Social network analysis of manga: similarities to real-world social networks and trends over decades

Kashin Sugishita and Naoki Masuda

Naoki Masuda

E-mail: [naokimas@buffalo.edu](mailto:naokimas@buffalo.edu)

**This PDF file includes:**

Fig. S1

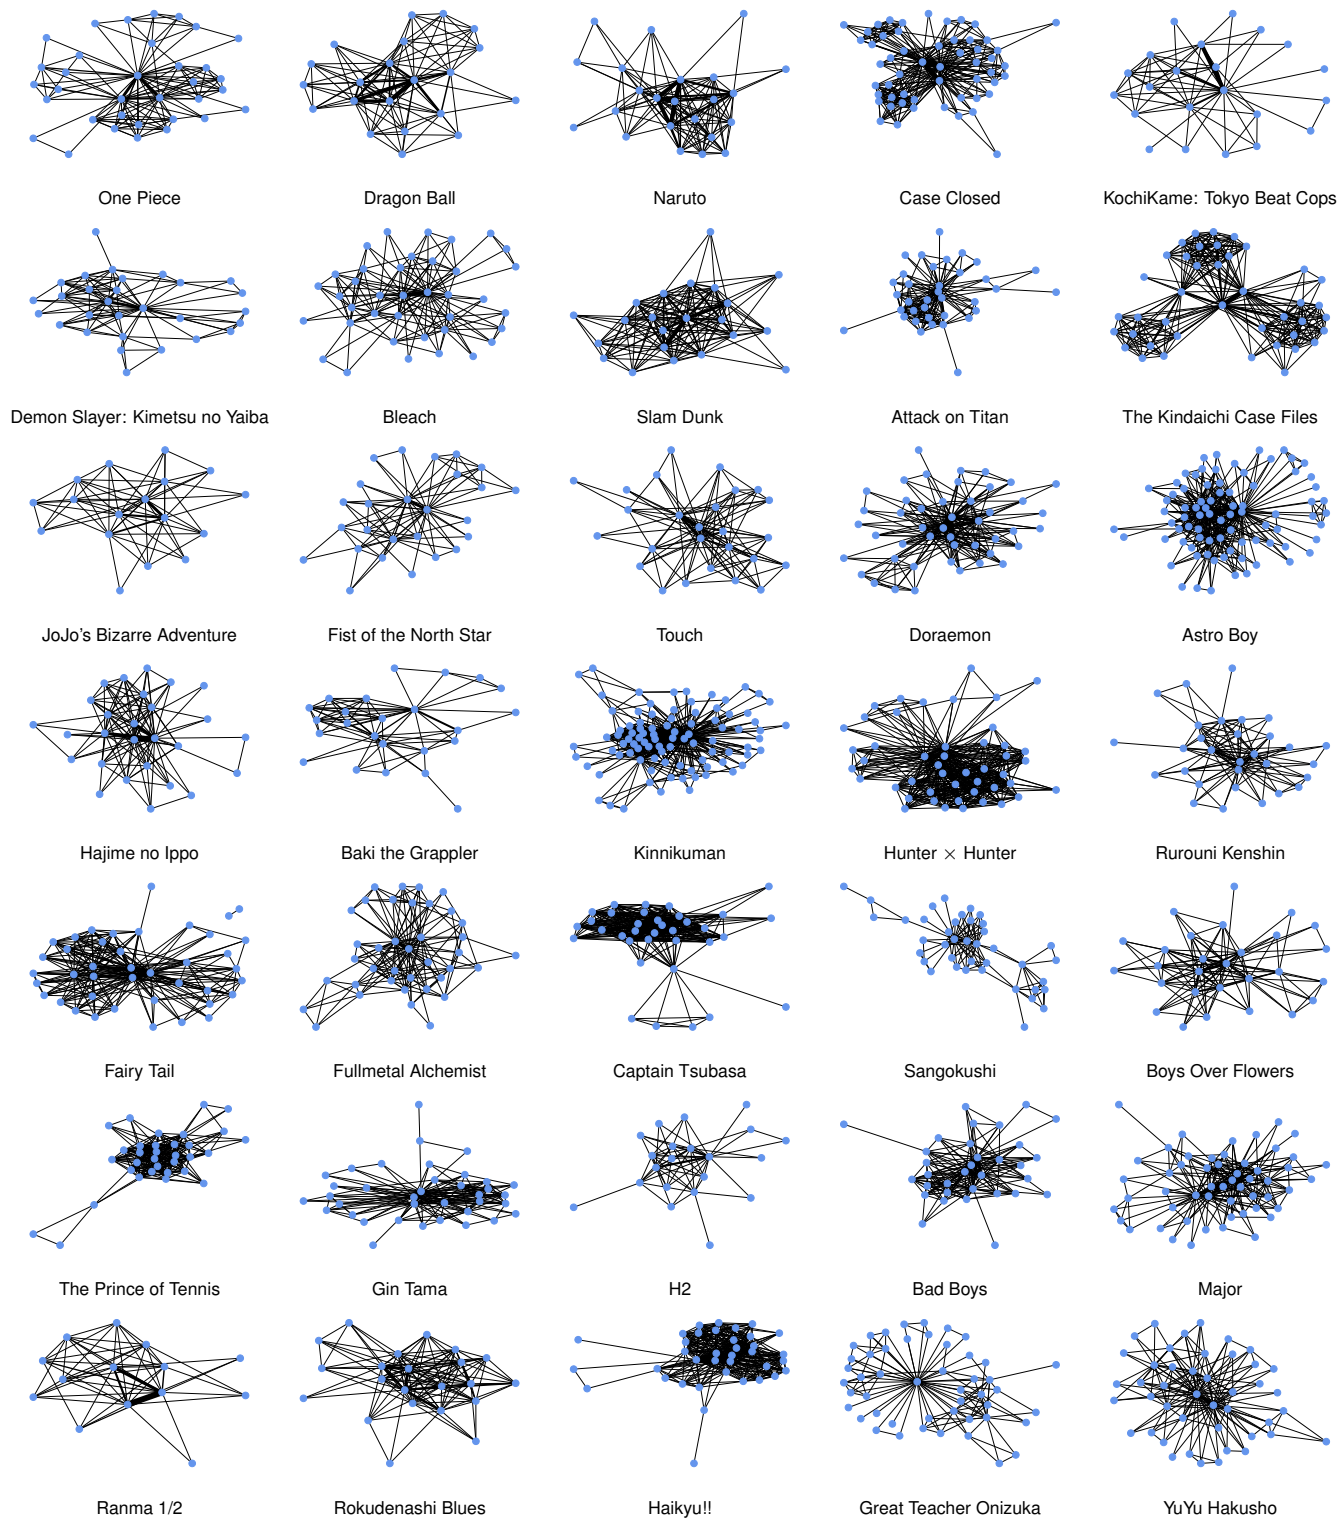

Fig. S1. Character networks for 162 manga

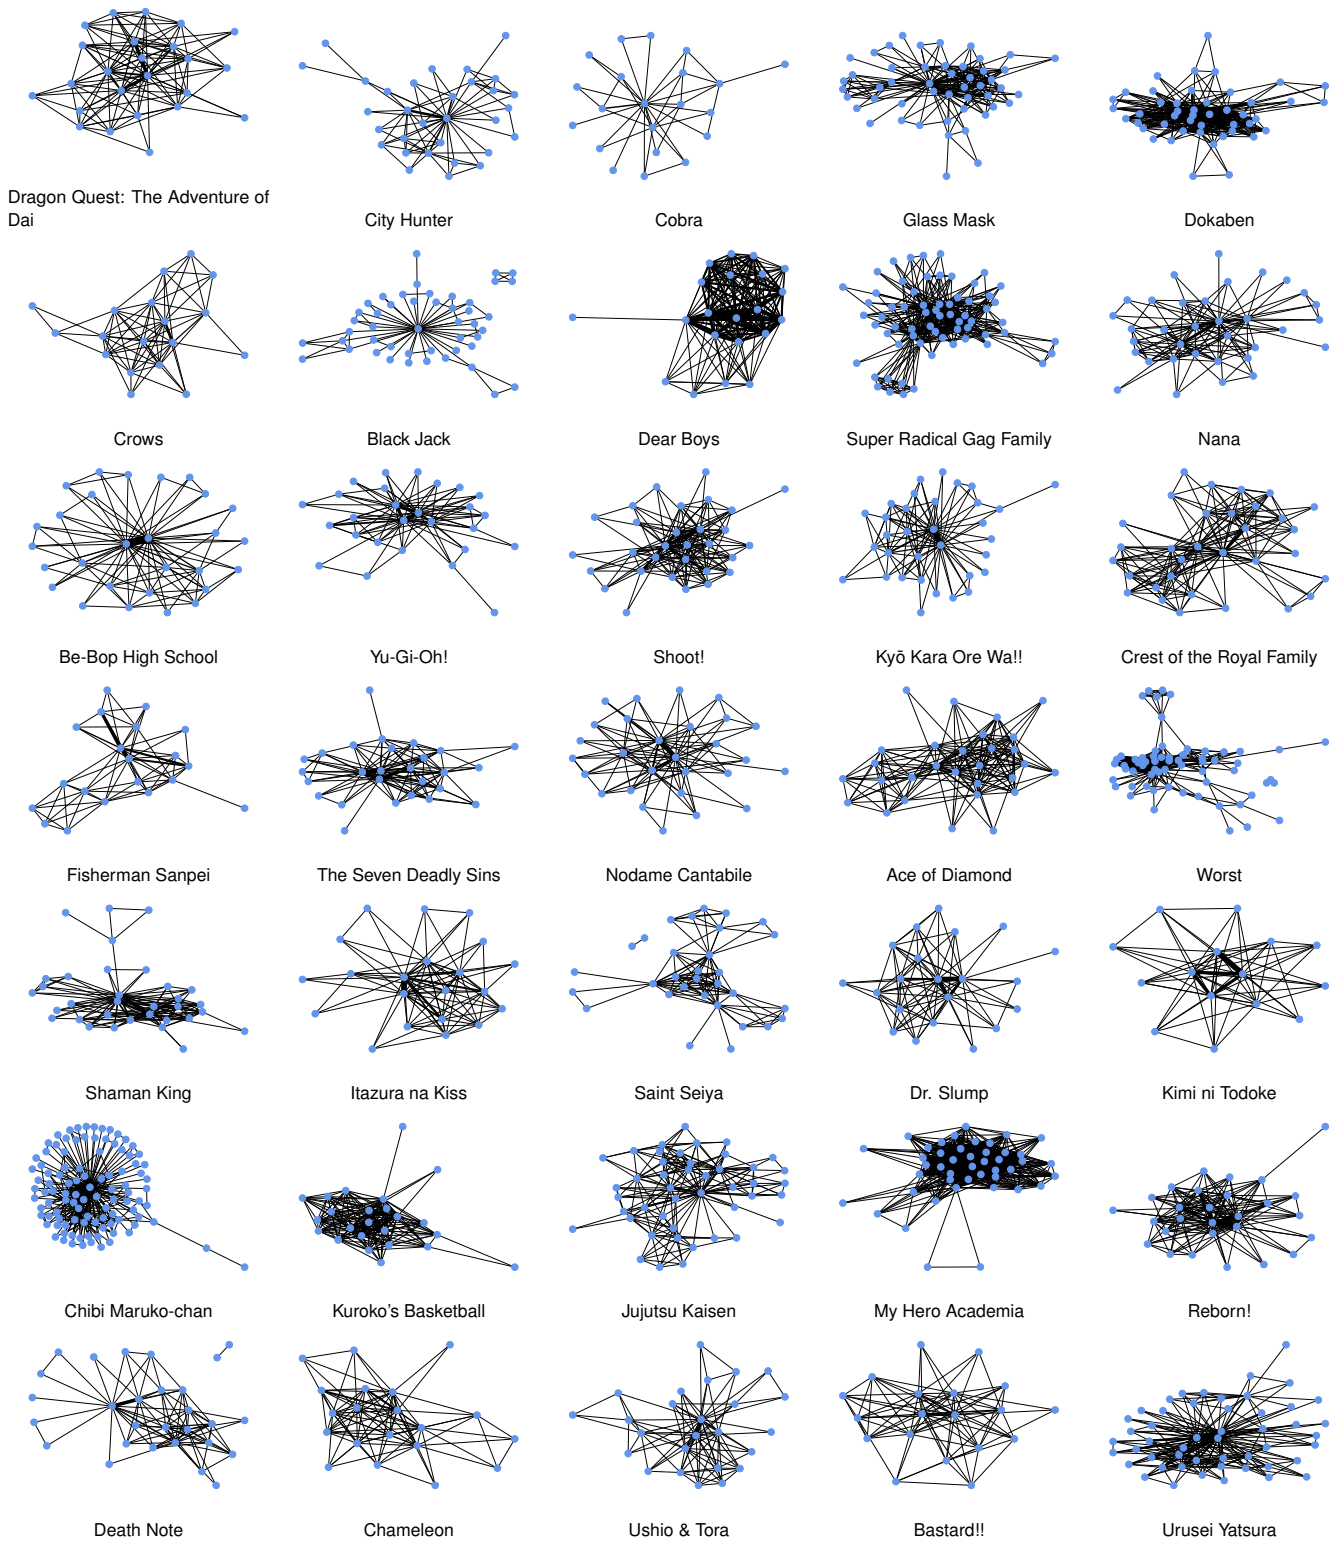

Fig. S1. Character networks for 162 manga (continued)

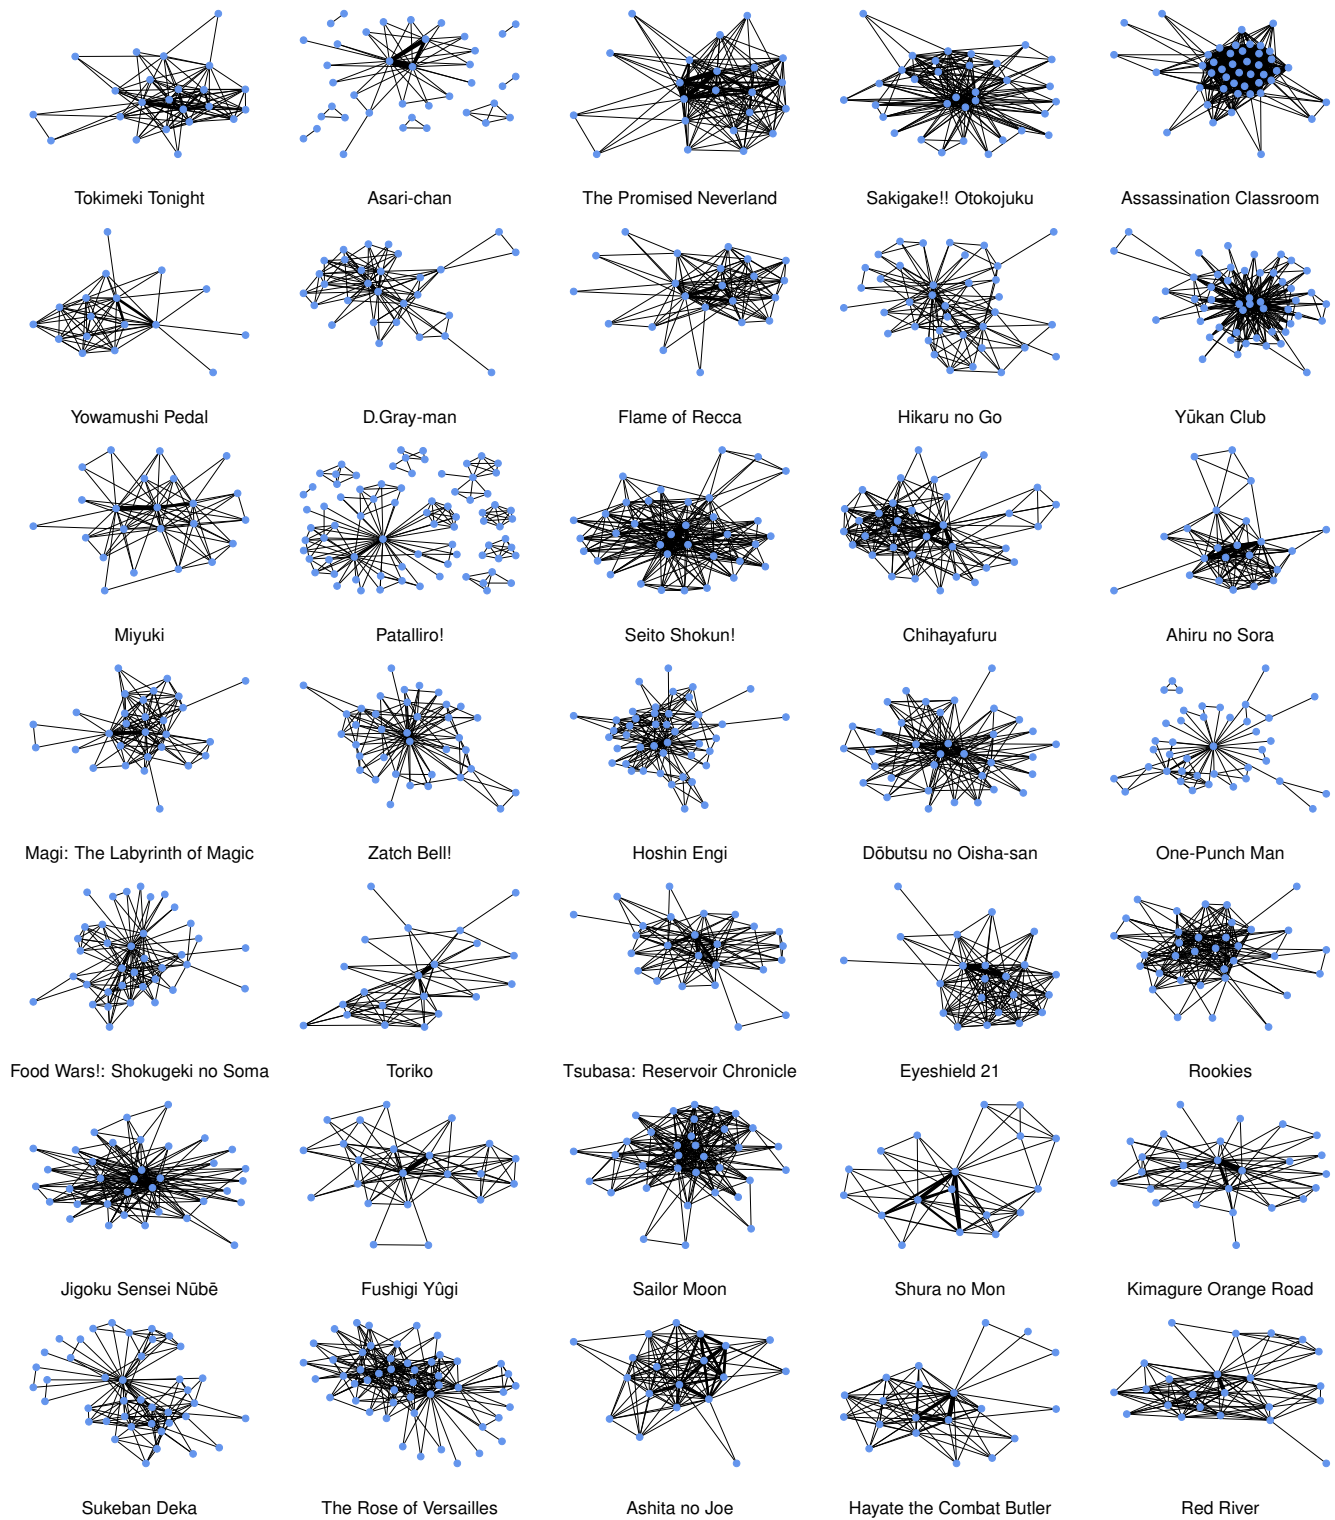

Fig. S1. Character networks for 162 manga (continued)

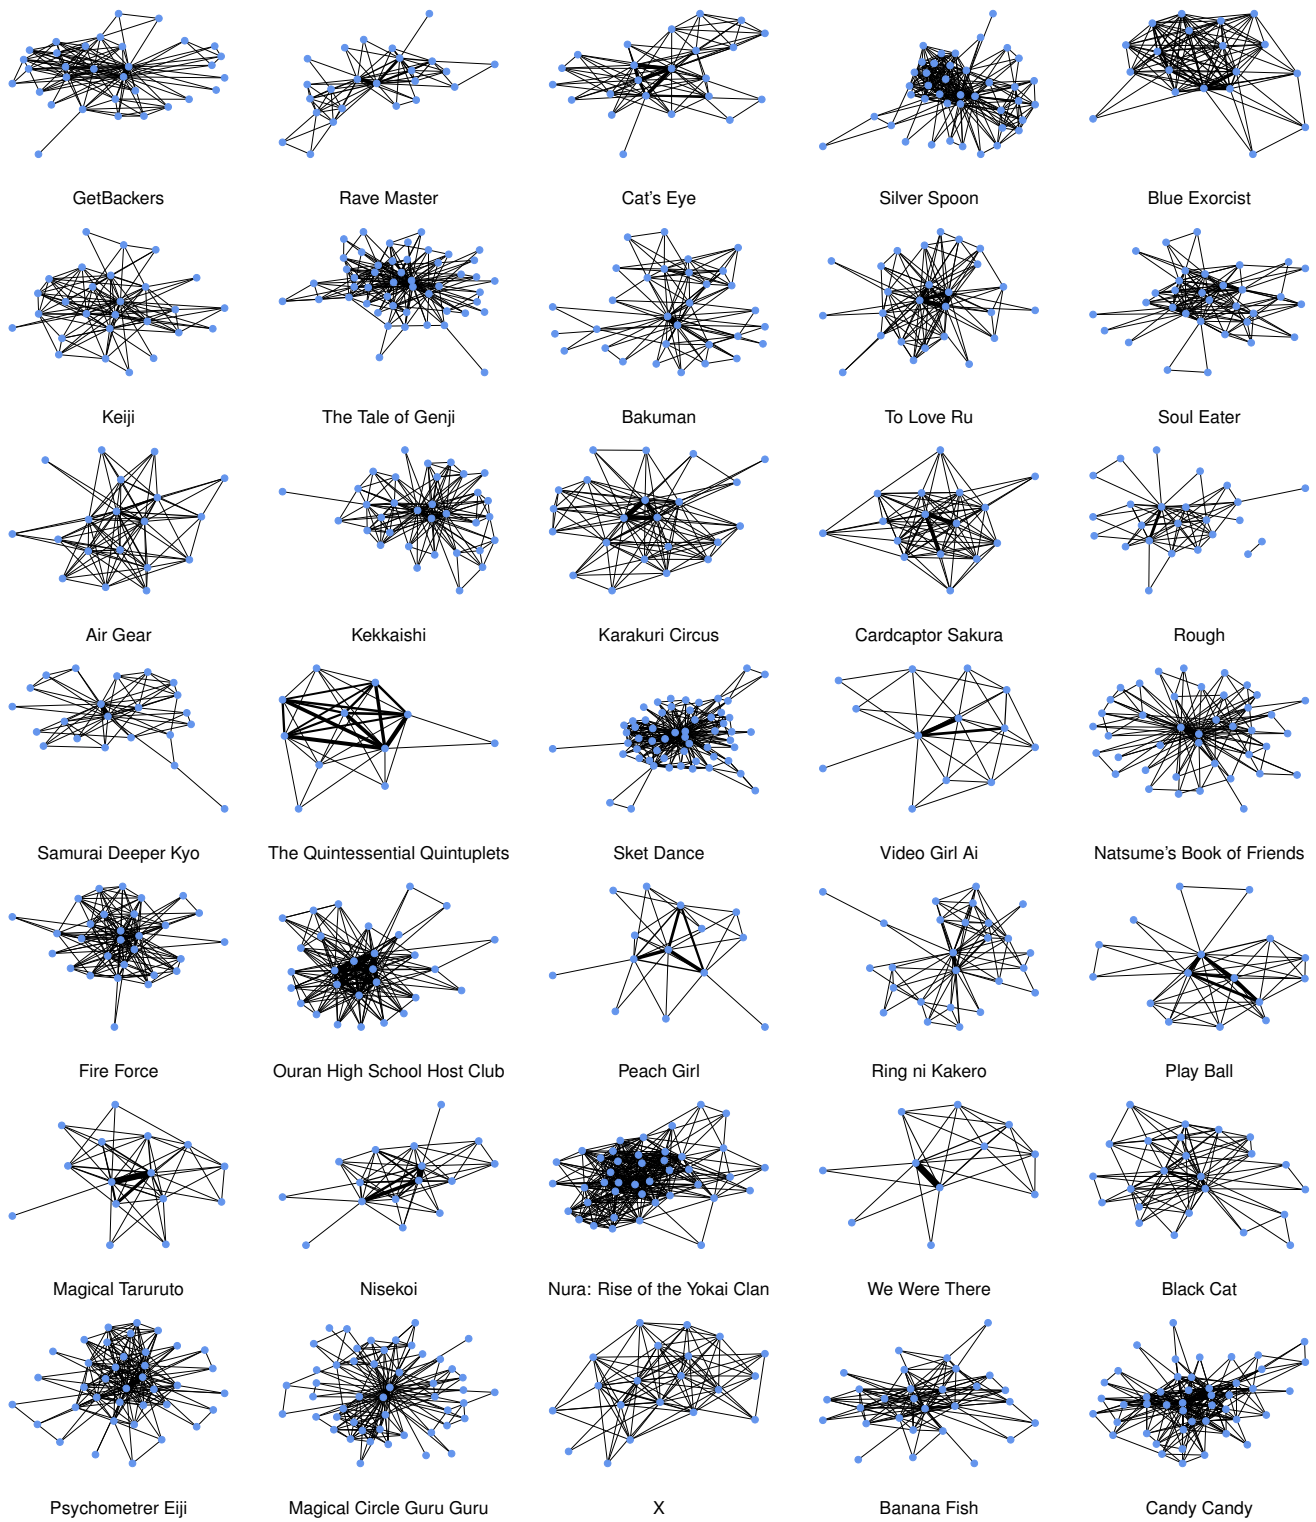

Fig. S1. Character networks for 162 manga (continued)

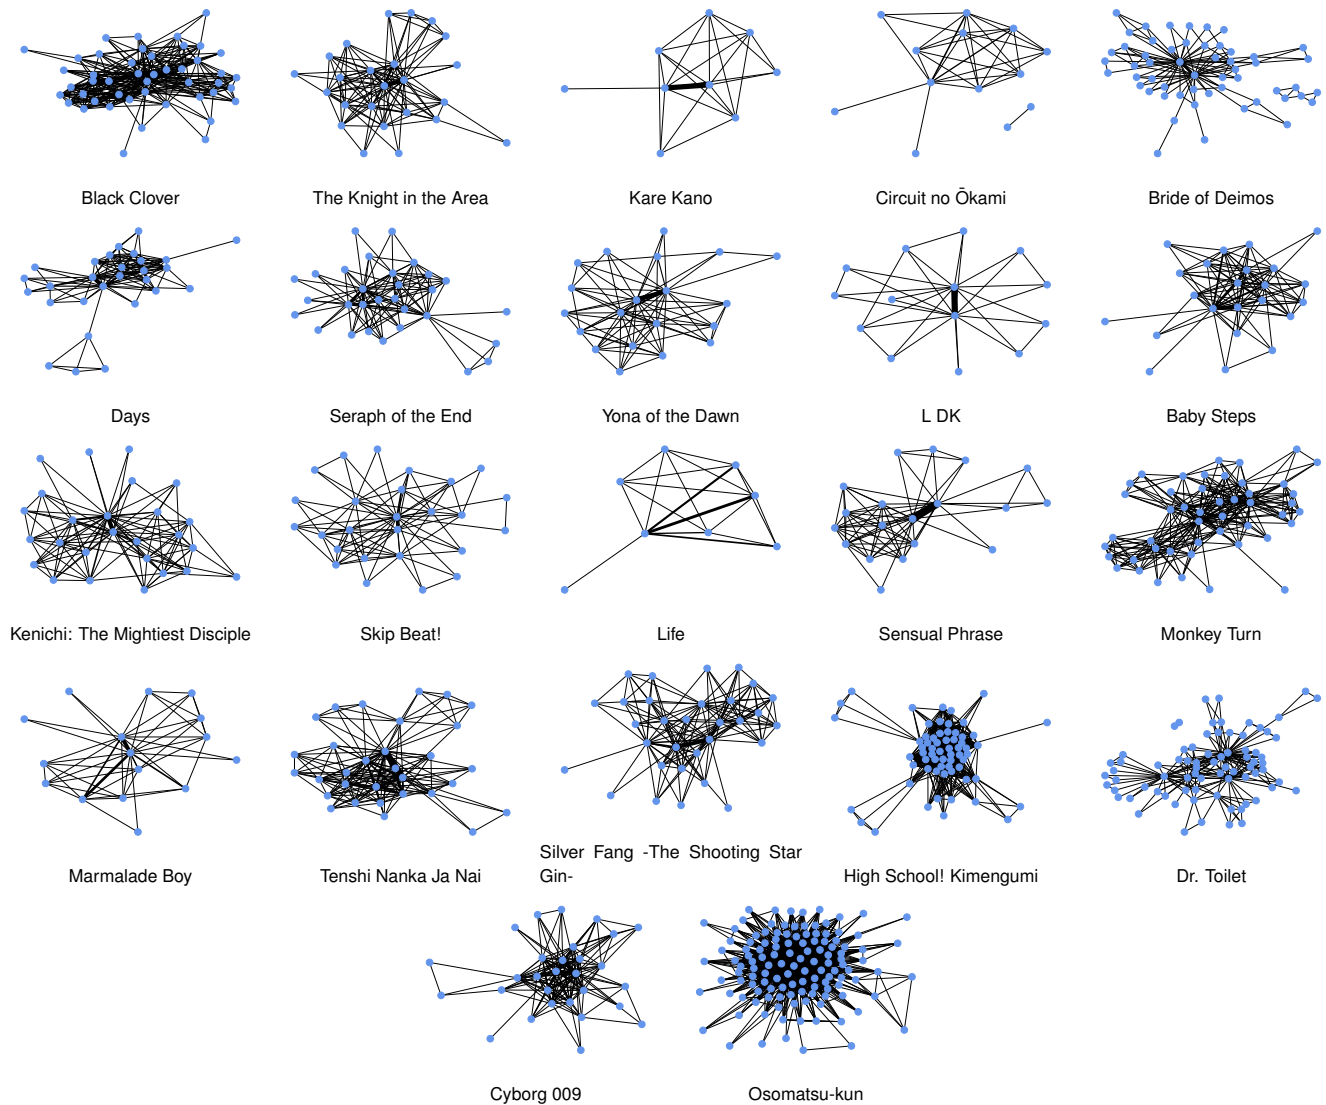

**Fig. S1.** Character networks for 162 manga (continued)
